# Supplementary material for: Integrating multi-type aberrations from DNA and RNA through dynamic mapping gene space for subtype-specific breast cancer driver discovery
Source: PeerJ. 2023 Feb 3;11:e14843. doi: 10.7717/peerj.14843 (PMC9901305; doi:10.7717/peerj.14843)
Supplement: Supplemental Information 1 [file peerj-11-14843-s001.pdf]

Supplementary Table 1. The full list of the top ranked candidates of our identified results, which contains considerable numbers of novel drivers.

| Rank | Gene            | Benchmark | InOthers | Rank | Gene       | Benchmark | InOthers | Rank | Gene     | Benchmark | InOthers | Rank | Gene     | Benchmark | InOthers | Rank | Gene            | Benchmark | InOthers |
|------|-----------------|-----------|----------|------|------------|-----------|----------|------|----------|-----------|----------|------|----------|-----------|----------|------|-----------------|-----------|----------|
| 1    | AKT1            | Known     | Yes      | 2    | EP300      | Known     | Yes      | 3    | IGH      | Known     | No       | 4    | C15orf65 | Known     | No       | 5    | C15orf65        | Unknown   | Yes      |
| 6    | TNFRSF17        | Known     | No       | 7    | DAXX       | Known     | No       | 8    | ESR1     | Known     | Yes      | 9    | SMAD3    | Known     | Yes      | 10   | NCOR2           | Known     | Yes      |
| 11   | PHOX2B          | Known     | No       | 12   | PWWP2A     | Known     | Yes      | 13   | JAZF1    | Known     | Yes      | 14   | BRCA1    | Known     | Yes      | 15   | CRLF2           | Known     | No       |
| 16   | BCL5            | Known     | No       | 17   | STAT3      | Known     | Yes      | 18   | HMOXA11  | Known     | Yes      | 19   | HMGN2P46 | Known     | No       | 20   | RM12            | Known     | No       |
| 21   | C12orf9         | Known     | No       | 22   | AR         | Known     | Yes      | 23   | IGK      | Known     | Yes      | 24   | CREBBP   | Known     | Yes      | 25   | SLC45A3         | Known     | Yes      |
| 26   | TAL2            | Known     | No       | 27   | LHFP       | Known     | No       | 28   | MLLT1    | Known     | No       | 29   | BCR      | Known     | No       | 30   | RARA            | Known     | Yes      |
| 31   | SPOP            | Known     | No       | 32   | RNF217-AS1 | Known     | Yes      | 33   | CNOT3    | Known     | Yes      | 34   | IL2      | Known     | No       | 35   | ARNTL           | Unknown   | No       |
| 36   | SMAD4           | Known     | No       | 37   | CD274      | Known     | Yes      | 38   | BCL5     | Unknown   | No       | 39   | MTCP1    | Known     | Yes      | 40   | CDC73           | Known     | No       |
| 41   | CDC73           | Unknown   | Yes      | 42   | ATG12      | Unknown   | No       | 43   | CITTA    | Known     | Yes      | 44   | CITTA    | Unknown   | No       | 45   | AKT1            | Unknown   | No       |
| 46   | DDX10           | Known     | Yes      | 47   | DAXX       | Unknown   | No       | 48   | FHIT     | Known     | No       | 49   | TTL      | Known     | No       | 50   | CTNBN1          | Known     | Yes      |
| 51   | CTNBN1          | Unknown   | No       | 52   | GATA1      | Known     | No       | 53   | COX6C    | Known     | Yes      | 54   | NUTM1    | Known     | Yes      | 55   | CCNB1           | Unknown   | Yes      |
| 56   | TP53            | Known     | Yes      | 57   | PIR1       | Known     | No       | 58   | NFIB     | Known     | Yes      | 59   | RB1      | Known     | Yes      | 60   | SOX2            | Known     | Yes      |
| 61   | MALAT1          | Known     | No       | 62   | NCOA1      | Known     | Yes      | 63   | EGFR     | Known     | Yes      | 64   | BRCA1    | Unknown   | No       | 65   | PTK6            | Known     | Yes      |
| 66   | BCL7A           | Known     | Yes      | 67   | CHC2       | Known     | Yes      | 68   | SMARCA4  | Known     | Yes      | 69   | ASXL1    | Known     | Yes      | 70   | BTG1            | Known     | Yes      |
| 71   | RUNX1           | Known     | Yes      | 72   | C12orf9    | Unknown   | No       | 73   | DROSHA   | Known     | Yes      | 74   | CREBBP   | Unknown   | No       | 75   | MSH6            | Known     | Yes      |
| 76   | BCL7A           | Unknown   | Yes      | 77   | CD79B      | Known     | Yes      | 78   | PHF6     | Known     | No       | 79   | IGL      | Known     | Yes      | 80   | PDGFRB          | Known     | Yes      |
| 81   | CIC             | Known     | No       | 82   | BCL11B     | Known     | No       | 83   | CDKN2A   | Known     | No       | 84   | CDX2     | Known     | No       | 85   | CREB1           | Known     | No       |
| 86   | SSX1            | Known     | No       | 87   | PBRM1      | Known     | Yes      | 88   | ETV4     | Known     | No       | 89   | H3F3B    | Known     | Yes      | 90   | CLTC            | Known     | Yes      |
| 91   | CCND1           | Known     | No       | 92   | CCND1      | Unknown   | Yes      | 93   | BTRC     | Unknown   | Yes      | 94   | CEP89    | Known     | Yes      | 95   | LRP1B           | Known     | No       |
| 96   | PAX7            | Known     | Yes      | 97   | CHIC2      | Unknown   | Yes      | 98   | AMER1    | Unknown   | Yes      | 99   | AHR      | Unknown   | No       | 100  | EBF1            | Known     | Yes      |
| 101  | PLAG1           | Known     | No       | 102  | STAT5B     | Known     | Yes      | 103  | DDR2     | Known     | Yes      | 104  | DDX3X    | Known     | Yes      | 105  | SMARCB1         | Known     | Yes      |
| 106  | MALT1           | Known     | Yes      | 107  | LCK        | Known     | Yes      | 108  | RSP02    | Known     | Yes      | 109  | LMO2     | Known     | Yes      | 110  | CAMTA1          | Known     | No       |
| 111  | APC             | Known     | Yes      | 112  | XPO1       | Known     | Yes      | 113  | CTCF     | Known     | No       | 114  | BTG1     | Unknown   | Yes      | 115  | MYCN            | Known     | Yes      |
| 116  | CRTC1           | Known     | No       | 117  | AKR1C1     | Unknown   | Yes      | 118  | ETV6     | Known     | Yes      | 119  | POU2AF1  | Known     | No       | 120  | DNM2            | Known     | Yes      |
| 121  | GATA2           | Known     | Yes      | 122  | CD2C5A     | Unknown   | Yes      | 123  | EGFR     | Unknown   | Yes      | 124  | HLF      | Known     | Yes      | 125  | RANBP2          | Known     | Yes      |
| 126  | CCNB1P1         | Known     | No       | 127  | TRC        | Known     | No       | 128  | TFR3     | Known     | Yes      | 129  | SF3B1    | Known     | Yes      | 130  | TAF15           | Known     | Yes      |
| 131  | ELK4            | Known     | No       | 132  | CD79A      | Known     | No       | 133  | BCL11A   | Known     | No       | 134  | WIF1     | Known     | No       | 135  | P2RY8           | Known     | No       |
| 136  | AKT2            | Known     | Yes      | 137  | ABL2       | Known     | Yes      | 138  | MAPK1    | Known     | No       | 139  | H3F3A    | Known     | No       | 140  | ETV1            | Known     | No       |
| 141  | ALDH2           | Known     | Yes      | 142  | YWHAE      | Known     | Yes      | 143  | SMAD2    | Known     | Yes      | 144  | PIK3R1   | Known     | Yes      | 145  | TCF3            | Known     | Yes      |
| 146  | HSP90AA1        | Known     | Yes      | 147  | ECH2L      | Known     | No       | 148  | FSTL3    | Known     | Yes      | 149  | CALCOCO1 | Unknown   | No       | 150  | ENSG00000119397 | Unknown   | No       |
| 151  | CAMTA1          | Unknown   | No       | 152  | CHD4       | Known     | Yes      | 153  | MYB      | Known     | Yes      | 154  | ASXL1    | Unknown   | No       | 155  | CDKN1B          | Known     | Yes      |
| 156  | NPM1            | Known     | No       | 157  | MET        | Known     | Yes      | 158  | HNFI1A   | Known     | Yes      | 159  | PAX5     | Known     | No       | 160  | HMG2A           | Known     | No       |
| 161  | CREB3L2         | Known     | No       | 162  | FGFR4      | Known     | Yes      | 163  | CHCHD7   | Known     | Yes      | 164  | PDGFRA   | Known     | Yes      | 165  | CCNE1           | Known     | No       |
| 166  | TCF12           | Known     | Yes      | 167  | EMIL4      | Unknown   | No       | 168  | EMIL4    | Unknown   | No       | 169  | TGFBF2   | Known     | Yes      | 170  | MXN1            | Known     | No       |
| 171  | PTEN            | Known     | Yes      | 172  | CHUK       | Unknown   | Yes      | 173  | FAS      | Known     | No       | 174  | DYNLL2   | Unknown   | No       | 175  | PBX1            | Known     | Yes      |
| 176  | JUN             | Known     | Yes      | 177  | CDKN2C     | Known     | Yes      | 178  | CDKN2C   | Unknown   | No       | 179  | NCOR1    | Known     | Yes      | 180  | IDH2            | Known     | Yes      |
| 181  | HOXC11          | Known     | No       | 182  | HSP90AB1   | Known     | Yes      | 183  | ERBB2    | Known     | Yes      | 184  | CBLB     | Known     | Yes      | 185  | CBLB            | Unknown   | No       |
| 186  | FLI1            | Known     | Yes      | 187  | KCNJ5      | Known     | No       | 188  | FAM46C   | Known     | Yes      | 189  | SET      | Known     | Yes      | 190  | STK11           | Known     | Yes      |
| 191  | MAP3K13         | Known     | Yes      | 192  | NTRK1      | Known     | No       | 193  | MLLT1    | Known     | No       | 194  | CREB3L1  | Known     | Yes      | 195  | ASPSR1          | Known     | Yes      |
| 196  | ASPSR1          | Unknown   | No       | 197  | MDM2       | Known     | Yes      | 198  | DDB2     | Known     | No       | 199  | CRTC1    | Unknown   | Yes      | 200  | CDC6            | Known     | No       |
| 201  | FEV             | Known     | Yes      | 202  | CEP89      | Unknown   | No       | 203  | SFPQ     | Known     | No       | 204  | DUX4L1   | Known     | No       | 205  | DUX4L1          | Unknown   | No       |
| 206  | DHX9            | Unknown   | Yes      | 207  | CARS       | Known     | No       | 208  | DDR2     | Unknown   | No       | 209  | CARD11   | Known     | No       | 210  | TLX1            | Known     | Yes      |
| 211  | CRK             | Unknown   | Yes      | 212  | CHD4       | Unknown   | Yes      | 213  | PLCG1    | Known     | Yes      | 214  | NTSC2    | Known     | No       | 215  | HOXD11          | Known     | No       |
| 216  | AR              | Unknown   | No       | 217  | DNMT3A     | Known     | No       | 218  | RBM15    | Known     | No       | 219  | IDH1     | Known     | No       | 220  | IL21R           | Known     | Yes      |
| 221  | HIST1H4I        | Known     | No       | 222  | HIF1A      | Known     | Yes      | 223  | EZR      | Known     | Yes      | 224  | FGFR3    | Known     | No       | 225  | CASP6           | Unknown   | Yes      |
| 226  | RANBP7          | Known     | No       | 227  | MLLT4      | Known     | Yes      | 228  | NAB2     | Known     | Yes      | 229  | LIFR     | Known     | Yes      | 230  | COL8A1          | Unknown   | No       |
| 231  | SSI1L1          | Known     | Yes      | 232  | PCSK7      | Known     | No       | 233  | CDX2     | Unknown   | No       | 234  | CDH1     | Known     | Yes      | 235  | ETNK1           | Known     | Yes      |
| 236  | RUNX1T1         | Known     | Yes      | 237  | ARHGDI1A   | Unknown   | Yes      | 238  | PICALM   | Known     | Yes      | 239  | KRAS     | Known     | No       | 240  | BCR             | Unknown   | No       |
| 241  | IKZF1           | Known     | Yes      | 242  | CUX1       | Known     | Yes      | 243  | CARM1    | Unknown   | Yes      | 244  | TFPT     | Known     | No       | 245  | LVL1            | Known     | No       |
| 246  | BCL3            | Known     | No       | 247  | KIAA1598   | Known     | No       | 248  | DEK      | Unknown   | No       | 249  | DNM1     | Unknown   | Yes      | 250  | BCORL1          | Known     | No       |
| 251  | ATG3            | Unknown   | No       | 252  | ERG        | Known     | Yes      | 253  | CCNB1P1  | Unknown   | No       | 254  | EPS15    | Known     | No       | 255  | PIK3CA          | Known     | Yes      |
| 256  | TCEA1           | Known     | Yes      | 257  | BARD1      | Unknown   | Yes      | 258  | BCL2     | Known     | No       | 259  | RAD21    | Known     | Yes      | 260  | CD5             | Unknown   | No       |
| 261  | SH3GL1          | Known     | No       | 262  | ELP3       | Unknown   | No       | 263  | DDX24    | Unknown   | No       | 264  | CFL1     | Unknown   | No       | 265  | AMER1           | Unknown   | No       |
| 266  | EEF1A1          | Unknown   | No       | 267  | TFEF       | Known     | Yes      | 268  | DISC1    | Unknown   | Yes      | 269  | ZNF384   | Known     | No       | 270  | ERC1            | Known     | No       |
| 271  | CASP1           | Unknown   | No       | 272  | GATA3      | Known     | Yes      | 273  | BCL9     | Known     | No       | 274  | ATRX     | Known     | No       | 275  | ELL             | Known     | Yes      |
| 276  | ELL             | Unknown   | No       | 277  | ATF7IP     | Unknown   | Yes      | 278  | HNRNP2A1 | Known     | No       | 279  | NUP98    | Known     | No       | 280  | CCND3           | Known     | Yes      |
| 281  | CCND3           | Unknown   | No       | 282  | CREB3L1    | Unknown   | Yes      | 283  | RHOH     | Known     | Yes      | 284  | ARHGAP26 | Known     | No       | 285  | APC             | Unknown   | No       |
| 286  | JAK1            | Known     | Yes      | 287  | ATG16L2    | Unknown   | Yes      | 288  | CSF3R    | Known     | No       | 289  | GNAS     | Known     | Yes      | 290  | EED             | Unknown   | No       |
| 291  | MSI2            | Known     | No       | 292  | CHAF1A     | Unknown   | Yes      | 293  | WT1      | Known     | No       | 294  | BCL3     | Unknown   | Yes      | 295  | CBFA2T2         | Unknown   | Yes      |
| 296  | BCOR            | Known     | No       | 297  | DDX5       | Known     | Yes      | 298  | DDX5     | Unknown   | No       | 299  | ATP1A1   | Known     | Yes      | 300  | ATP1A1          | Unknown   | No       |
| 301  | CLTCL1          | Known     | Yes      | 302  | KIAA1549   | Known     | Yes      | 303  | GPHN     | Known     | Yes      | 304  | CTBP1    | Unknown   | Yes      | 305  | HOXC13          | Known     | Yes      |
| 306  | RBM10           | Known     | Yes      | 307  | NUP214     | Known     | Yes      | 308  | ALG13    | Unknown   | Yes      | 309  | EIF3E    | Known     | No       | 310  | C3              | Unknown   | Yes      |
| 311  | MYC             | Known     | Yes      | 312  | CHCHD7     | Unknown   | No       | 313  | DDIT3    | Known     | No       | 314  | CDK1     | Unknown   | No       | 315  | DNMT3A          | Unknown   | Yes      |
| 316  | MEN1            | Known     | Yes      | 317  | SDC4       | Known     | No       | 318  | ELN      | Known     | Yes      | 319  | RNF213   | Known     | No       | 320  | CCNA2           | Unknown   | No       |
| 321  | CSNK1A1         | Unknown   | No       | 322  | NFKB2      | Known     | Yes      | 323  | AP2S1    | Unknown   | Yes      | 324  | CREB1    | Unknown   | No       | 325  | MTF             | Known     | No       |
| 326  | PTPRC           | Known     | No       | 327  | FGFR2      | Known     | Yes      | 328  | ARHGAP26 | Unknown   | No       | 329  | BCL10    | Known     | No       | 330  | ERBB3           | Known     | Yes      |
| 331  | BRD3            | Known     | No       | 332  | BCL6       | Unknown   | Yes      | 333  | CCT7     | Unknown   | No       | 334  | LTTR1    | Known     | No       | 335  | BRIC3           | Known     | No       |
| 336  | DDX3X           | Unknown   | Yes      | 337  | BCORL1     | Unknown   | No       | 338  | PCMI     | Known     | Yes      | 339  | TPR      | Known     | Yes      | 340  | FBXW7           | Known     | Yes      |
| 341  | ENSG00000092199 | Unknown   | No       | 342  | BCL6       | Known     | No       | 343  | ATP2B3   | Known     | Yes      | 344  | CSNK2A1  | Unknown   | Yes      | 345  | STRN            | Known     | Yes      |
| 346  | TRIM33          | Known     | No       | 347  | CANT1      | Known     | No       | 348  | CANT1    | Unknown   | No       | 349  | CLIP1    | Known     | No       | 350  | MTOR            | Known     | Yes      |
| 351  | SSX2            | Known     | No       | 352  | EWSR1      | Known     | Yes      | 353  | PTPN13   | Known     | No       | 354  | STAG2    | Known     | Yes      | 355  | EHMT1           | Unknown   | No       |
| 356  | DCC             | Unknown   | Yes      | 357  | FCGR2B     | Known     | No       | 358  | LMO1     | Known     | Yes      | 359  | ACVR1    | Known     | No       | 360  | ACVR1           | Unknown   | No       |
| 361  | COL2A1          | Known     | Yes      | 362  | EHMT2      | Unknown   | No       | 363  | THRAP3   | Known     | No       | 364  | RPL22    | Known     | No       | 365  | ATXN1           | Unknown   | Yes      |
| 366  | DDX10           | Unknown   | No       | 367  | TALI       | Known     | No       | 368  | CBL      | Known     | Yes      | 369  | DRD4     | Unknown   | No       | 370  | PTPRB           | Known     | Yes      |
| 371  | PPFIBP1         | Known     | No       | 372  | TBL1XR1    | Known     | Yes      | 373  | DICER1   | Known     | No       | 374  | REL      | Known     | Yes      | 375  | SEPT6           | Known     | No       |
| 376  | CREB3L2         | Unknown   | No       | 377  | ALK        | Known     | Yes      | 378  | SETBP1   | Known     | No       | 379  | TCL6     | Known     | No       | 380  | ATM             | Known     | Yes      |
| 381  | CFD1            | Unknown   | Yes      | 382  | 25937      | Unknown   | No       | 383  | BCL6     | Unknown   | No       | 384  | FBNP1    | Known     | No       | 385  | LEP1            | Known     | No       |
| 386  | MKL1            | Known     | Yes      | 387  | CALM3      | Unknown   | Yes      | 388  | USP6     | Known     | No       | 389  | FAM131B  | Known     | No       | 390  | DDX18           | Unknown   | Yes      |
| 391  | SDI1            | Known     | Yes      | 392  | ELK1       | Unknown   | No       | 393  | AXIN2    | Known     | No       | 394  | VTI1A    | Known     | Yes      | 395  | CBFB            | Known     | Yes      |
| 396  | KMT2D           | Known     | Yes      | 397  | ANP32A     | Unknown   | No       | 398  | VHL      | Known     | No       | 399  | CBFB     | Unknown   | No       | 400  | AXIN1           | Known     | Yes      |
| 401  | MAX             | Known     | Yes      | 402  | BSG        | Unknown   | No       | 403  | DNAJA3   | Unknown   | No       | 404  | MAFB     | Known     | Yes      | 405  | CALR            | Known     | No       |
| 406  | CBLC            | Known     | Yes      | 407  | CBLC       | Unknown   | No       | 408  | CTLA4    | Unknown   | Yes      | 409  | KIF5B    | Known     | No       | 410  | CCNA1           | Unknown   | Yes      |
| 411  | SOC1            | Known     | No       | 412  | CTNND2     | Unknown   | No       | 413  | FLT4     | Known     | No       | 414  | RAC1     | Known     | Yes      | 415  | EIF3B           | Unknown   | Yes      |
| 416  | TERT            | Known     | No       | 417  | COL1A1     | Known     | Yes      | 418  | CCL7     | Unknown   | No       | 419  | NONO     | Known     | Yes      | 420  | KDM5A           | Known     | Yes      |
| 421  | CDH2            | Unknown   | Yes      | 422  | CLSR2      | Unknown   | No       | 423  | FOXA1    | Known     | Yes      | 424  | DHX35    | Unknown   | Yes      | 425  | CD79A           | Unknown   | No       |
| 426  | CYLD            | Known     | No       | 427  | RELGD5     | Known     | No       | 428  | NR4A3    | Known     | No       | 429  | DDX1     | Unknown   | No       | 430  | ATN1            | Unknown   | Yes      |
| 431  | LASP1           | Known     | No       | 432  | CASP8      | Known     | Yes      | 433  | BCL2     | Unknown   | No       | 434  | ASCC2    | Unknown   |          |      |                 |           |          |
