# Supplementary material for: Integrating multi-type aberrations from DNA and RNA through dynamic mapping gene space for subtype-specific breast cancer driver discovery
Source: PeerJ journal article supplement (doi:10.7717/peerj.14843), 2023-02-03
Supplement: SupplementaryFigure1.pdf [file SupplementaryFigure1.pdf]

(A)

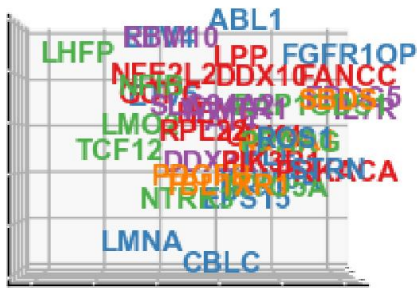

STRING (the front view)  
(Elevation=0°, Azimuth=0°)

(B)

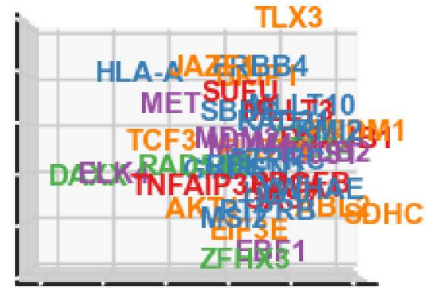

iRefIndex (the front view)  
(Elevation=0°, Azimuth=0°)

(C)

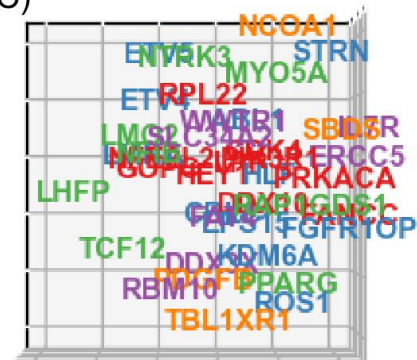

STRING (the top view)  
(Elevation=90°, Azimuth=0°)

(D)

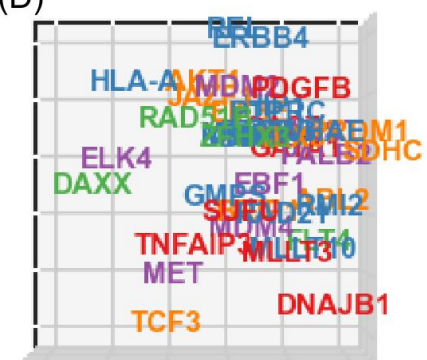

iRefIndex (the top view)  
(Elevation=90°, Azimuth=0°)

(E)

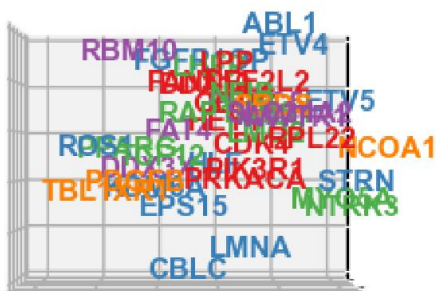

STRING (the side view)  
(Elevation=0°, Azimuth=90°)

(F)

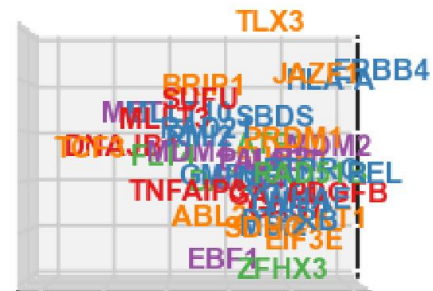

iRefIndex (the side view)  
(Elevation=0°, Azimuth=90°)

**Supplementary Figure 1.** The three view drawings of the t-SNE 3D visualization for subtype-specificities of discovered drivers by our approach, including the front view, the top view, and the side view of the 3D visualization. (A) and (B) show the front view of the 3D visualization results with interaction source of STRING and iRefIndex, respectively. (C) and (D) show the top view of the 3D visualization results with interaction source of STRING and iRefIndex, respectively. (E) and (F) show the side view of the 3D visualization results with interaction source of STRING and iRefIndex, respectively.
